# Supplementary material for: Ecology and Infection Status of Sand Flies in Rural and Urban Cutaneous Leishmaniasis Endemic Areas in Northwest Ethiopia
Source: MDPI journal article supplement (doi:10.3390/tropicalmed9030052), 2024-02-23
Supplement: s1 [file s1]

## Supplementary Materials:

**Table S1.** Proportions of engorgement status of female *Phlebotomus longipes* sand flies, in urban Addis-Alem and rural Gindmeteaye.

| Engorgement status | Addis-Alem<br>(urban) | Gindmeteaye<br>(rural) | Combined   |
|--------------------|-----------------------|------------------------|------------|
| Blood fed          | 31 (13%)              | 57 (28%)               | 88 (20%)   |
| Gravid             | 22 (10%)              | 37 (18%)               | 59 (14%)   |
| Non-fed/sugar-fed  | 175 (77%)             | 108 (54%)              | 283 (66%)  |
| <b>Total</b>       | <b>228</b>            | <b>202</b>             | <b>430</b> |
